# Supplementary material for: Epigenetic regulation of starvation-induced autophagy in Drosophila by histone methyltransferase G9a
Source: PubMed Central journal article supplement (PMC5544687; doi:10.1038/s41598-017-07566-1), 2017-08-04
Supplement: 41598_2017_7566_MOESM1_ESM.pdf [file 41598_2017_7566_MOESM1_ESM.pdf]

**Supplemental information:**

**Epigenetic regulation of starvation-induced autophagy in *Drosophila*  
by histone methyltransferase G9a**

**Phan Nguyen Thuy An<sup>1,\*</sup>, Kouhei Shimaji<sup>2,3,\*</sup>, Ryo Tanaka<sup>2,3</sup>, Hideki Yoshida<sup>2,3</sup>, Hiroshi Kimura<sup>4</sup>,  
Eiichiro Fukusaki<sup>1,\*\*</sup>, Masamitsu Yamaguchi<sup>2,3,\*\*</sup>**

<sup>1</sup> Department of Biotechnology, Graduate School of Engineering, Osaka University, 2-1 Yamadaoka, Suita, Osaka, 565-0871, Japan.

<sup>2</sup> Department of Applied Biology, <sup>3</sup> The Center for Advanced Insect Research Promotion, Kyoto Institute of Technology, Kyoto, 606-8585, Japan.

<sup>4</sup> Department of Biological Sciences, Graduate School of Bioscience and Biotechnology, Tokyo Institute of Technology, Nagatsuta, Midori-ku, Yokohama, 226-8501, Japan.

\* These authors contributed equally to this work

\*\*Corresponding author

MY: Tel.: +81 75 724 7781; Fax: +81 75 724 7799; E-mail: [myamaguc@kit.ac.jp](mailto:myamaguc@kit.ac.jp)

EF: Tel./ Fax: +81-6-6879-7424; E-mail: [fukusaki@bio.eng.osaka-u.ac.jp](mailto:fukusaki@bio.eng.osaka-u.ac.jp)

**Table S1. Potential metabolites affected due to the loss of *dG9a* during starvation.**

| Compound     | OPLS-DA |      | <i>p</i> -value from Two-way ANOVA |          |             |
|--------------|---------|------|------------------------------------|----------|-------------|
|              | p(corr) | VIP  | Starved time                       | Genotype | Interaction |
| Threonine    | -0.63   | 1.53 | 7.15E-04                           | 2.45E-07 | 5.40E-03    |
| Inositol     | -0.96   | 2.32 | 1.59E-05                           | 6.88E-23 | 7.05E-03    |
| Serine       | 0.56    | 1.32 | 1.23E-03                           | 7.14E-06 | 7.05E-03    |
| Methionine   | 0.65    | 1.61 | 4.65E-02                           | 1.02E-06 | 7.54E-03    |
| Uric acid    | -0.92   | 2.26 | 9.71E-07                           | 2.42E-20 | 3.73E-02    |
| Tryptophan   | -0.86   | 2.11 | 5.85E-06                           | 3.43E-15 | 4.02E-02    |
| Lactic acid  | 0.42    | 1.06 | 1.21E-02                           | 1.62E-03 | 4.35E-02    |
| Acetyl CoA   | -0.54   | 1.34 | 1.51E-02                           | 1.08E-04 | 0.09        |
| Fructose     | -0.53   | 1.21 | 2.39E-06                           | 7.14E-06 | 0.08        |
| Guanosine    | -0.97   | 2.36 | 0.12                               | 1.01E-20 | 0.20        |
| Glutamine    | 0.73    | 1.72 | 4.48E-02                           | 1.02E-06 | 0.21        |
| FMN          | -0.68   | 1.68 | 0.35                               | 4.75E-06 | 0.23        |
| Urea         | -0.50   | 1.22 | 3.94E-02                           | 1.62E-03 | 0.22        |
| NADP         | -0.49   | 1.20 | 0.19                               | 2.77E-03 | 0.32        |
| Xylitol      | -0.47   | 1.14 | 0.15                               | 5.22E-03 | 0.38        |
| NADPH        | 0.85    | 2.08 | 0.06                               | 1.01E-10 | 0.41        |
| Ru5P         | -0.48   | 1.14 | 8.52E-07                           | 1.59E-05 | 0.55        |
| cAMP         | -0.41   | 1.01 | 0.13                               | 1.03E-02 | 0.52        |
| Hypoxanthine | -0.56   | 1.36 | 1.52E-02                           | 2.35E-04 | 0.56        |
| Pyruvate     | 0.47    | 1.11 | 1.24E-02                           | 5.23E-03 | 0.56        |
| GMP          | 0.62    | 1.43 | 1.31E-02                           | 7.98E-05 | 0.62        |
| Asparagine   | 0.63    | 1.52 | 4.70E-06                           | 1.14E-06 | 0.91        |
| G6P          | -0.46   | 1.10 | 9.09E-03                           | 2.77E-03 | 0.91        |
| Inosine      | -0.86   | 2.07 | 1.57E-02                           | 9.41E-11 | 0.92        |
| Malic acid   | -0.49   | 1.22 | 0.18                               | 5.35E-03 | 0.97        |

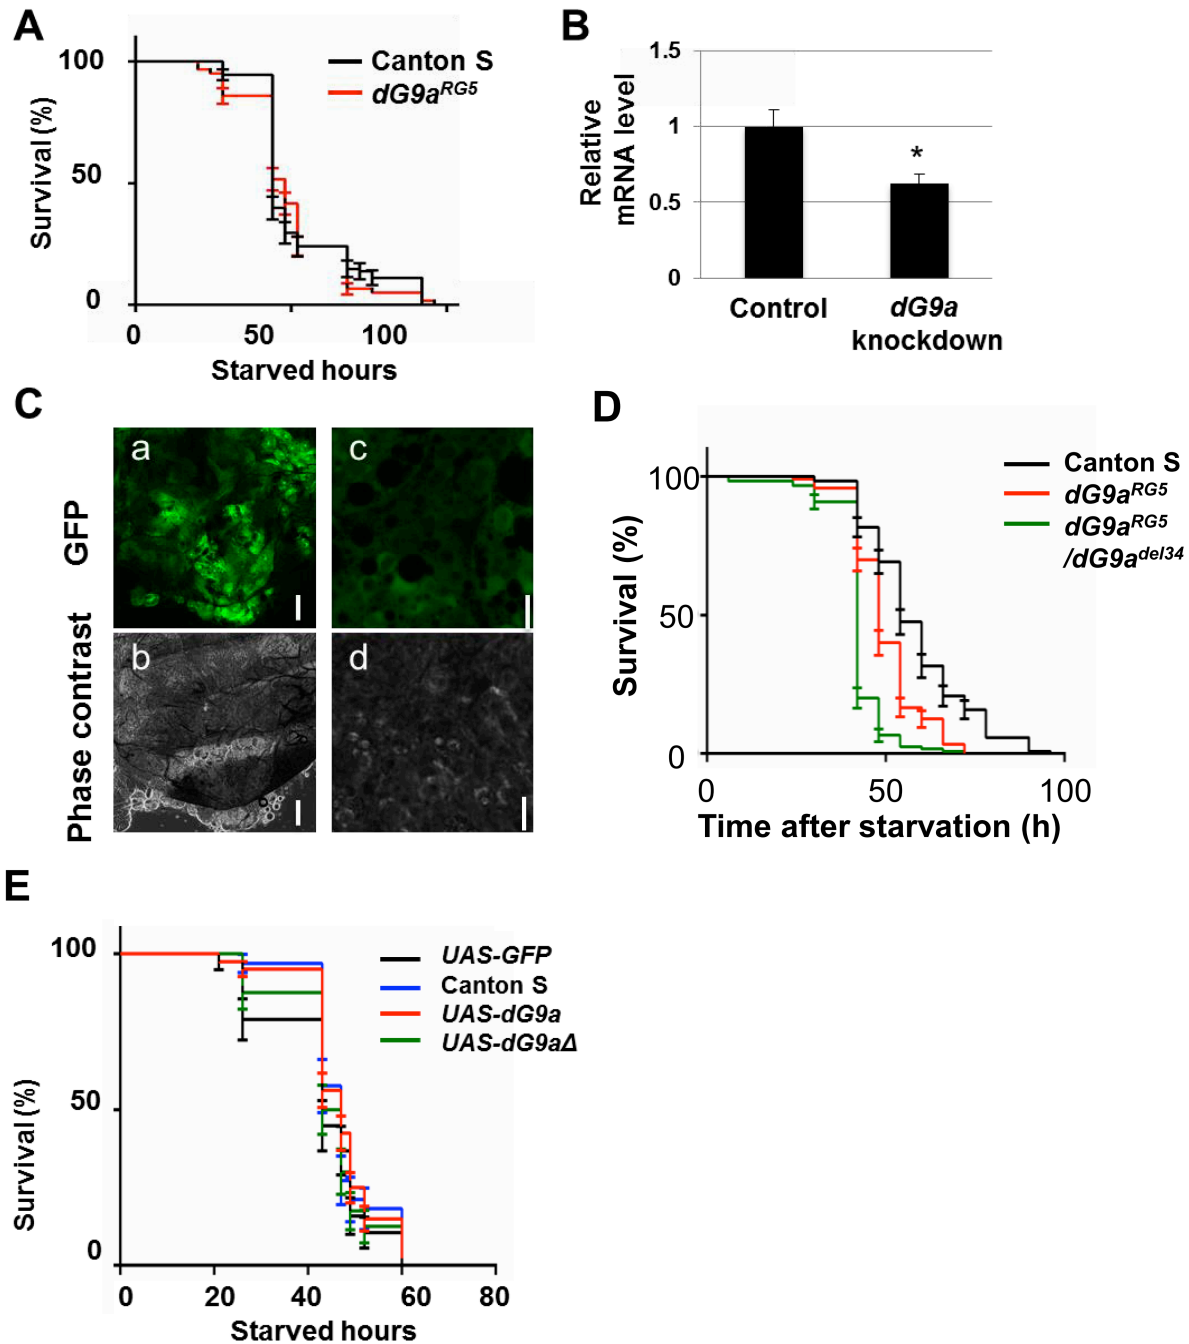

**Figure S1.** (A) The result of viability assay under starvation conditions using larvae of wild type and *dG9a<sup>RG5</sup>* mutant (n=120 from 6 independent experiments).  $P > 0.05$ . (B) Quantification of mRNA level of *dG9a* in fat-body specifically *dG9a* knockdown strain (w; FB-GAL4/UAS-FLAG-IR *dG9a* ;+) and control strain (w; FB-GAL4/+;+). n=3. \* $P < 0.05$ . (C) Immunostaining with anti-GFP antibody in the adult abdominal fat body. The used fly

strain was *P(GAL4)fat; UAS-GFP*. Scale bars: (a,b) 0.9 mm, (c,d) 100 $\mu$ m. **(D)** The result of viability assay under starvation conditions using adult female of Canton S, *dG9a<sup>RG5</sup>* and *dG9a<sup>RG5</sup>/dG9a<sup>del34</sup>*. n=100 from 5 independent experiments. Error bars represent standard errors (SE). Significant differences were observed between Canton S and *dG9a<sup>RG5</sup>* ( $P < 0.0001$ ), between Canton S and *dG9a<sup>RG5</sup>/dG9a<sup>del34</sup>* ( $P < 0.0001$ ) and between *dG9a<sup>RG5</sup>* and *dG9a<sup>RG5</sup>/dG9a<sup>del34</sup>* ( $P < 0.0001$ ). *dG9a<sup>RG5</sup>* lacks the whole open reading frame (ORF) of *dG9a*, however, *dG9a<sup>del34</sup>* lacks a part of *CG3038* including its transcription start site as well as almost all of the ORF of *dG9a*<sup>21</sup>. *CG3038* is suggested to have glycosyl transferase activity based on the sequence and structural similarity (Flybase:<http://flybase.org/>). The possible reduction of *CG3038* may result in the further reduction of starvation tolerance in *dG9a<sup>RG5</sup>/dG9a<sup>del34</sup>* compared with *dG9a<sup>RG5</sup>* flies. **(E)** The results of viability assay under starvation conditions utilizing male flies of *UAS-GFP* (*UAS-GFP/+*) (n=38 from 2 independent experiments), Canton S (n=33 from 2 independent experiments), *UAS-dG9a $\Delta$*  (*UAS-dG9a $\Delta$ /+*) (n=40 from 2 independent experiments) and *UAS-dG9a* (*UAS-dG9a/+*) (n=80 from 4 independent experiments).  $P > 0.05$ .

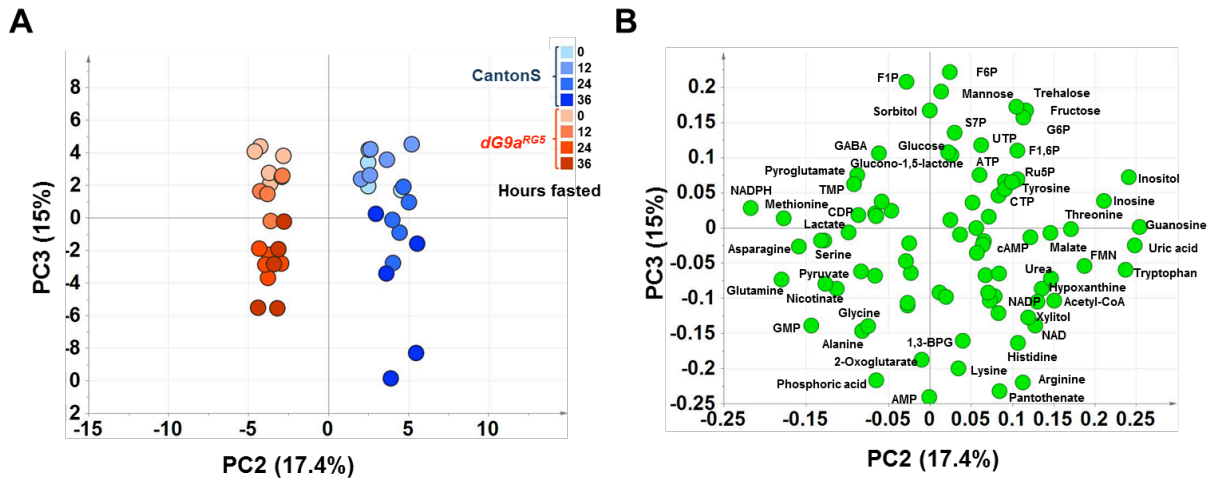

**Figure S2. Metabolic profile of wild type and *dG9a<sup>RG5</sup>* mutant flies under starvation.** PCA score plot (upper panel) constructed by PC2 (17.4%) and PC3 (15%) shows the discriminations in genotypes and in various time points under starvation. This discrimination is explained by the composition of metabolites on loading plot (lower panel). 4-5 replications for each time point.

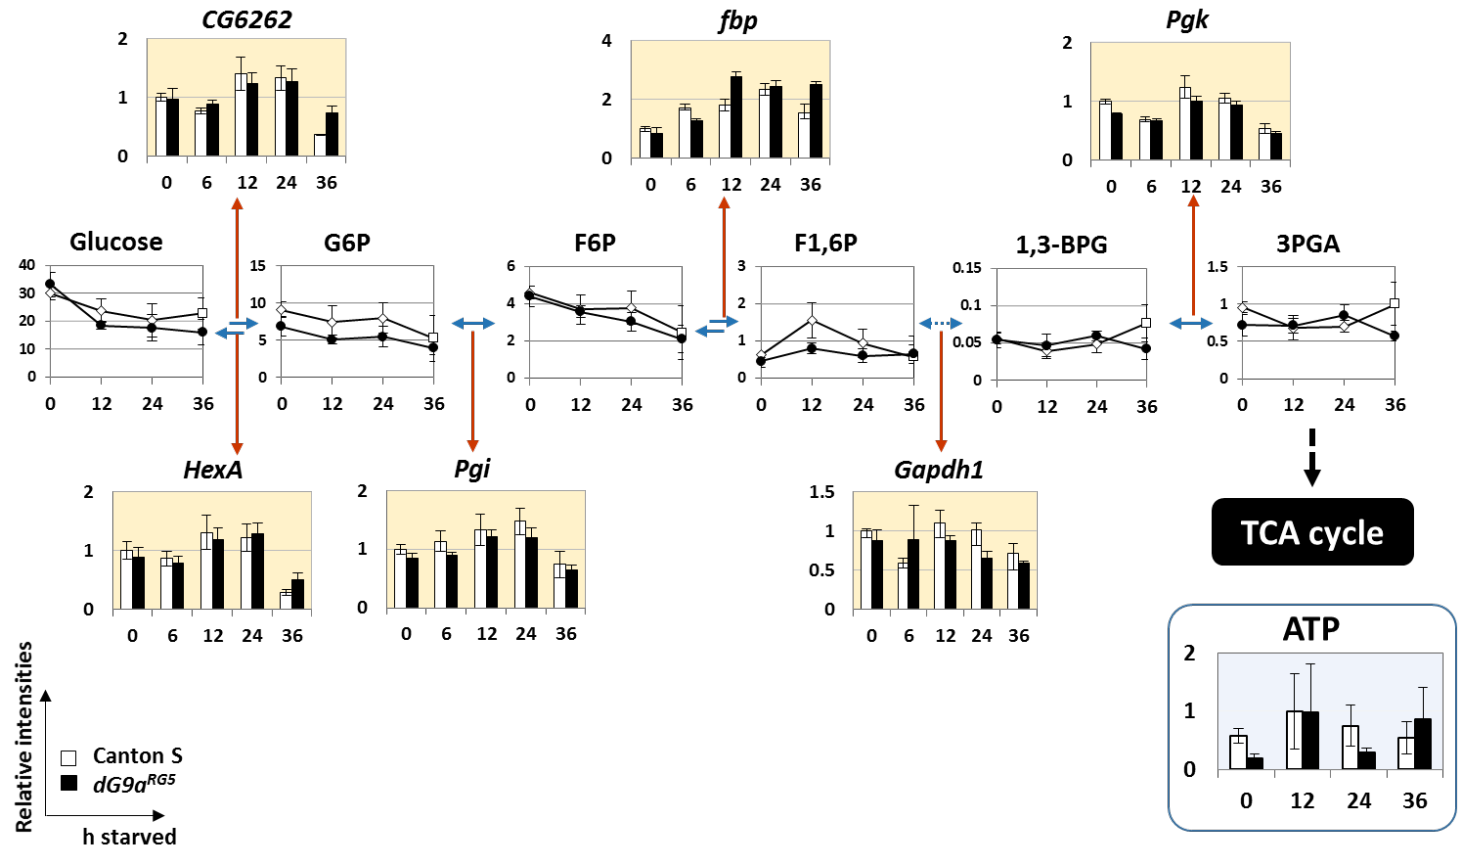

**Figure S3. Glycolysis pathway of wild type and *dG9a<sup>RG5</sup>* mutant flies during fasting.** The line graphs showing the changes of metabolites. 4-5 replications for each time point. The bar graphs showing the mRNA level of enzymes related to glycolysis. 1,3-BPG: 1,3-Biphosphoglycerate; 3PGA: 3-Phosphoglycerate; F6P: Fructose 6-phosphate; F1,6P: Fructose 1,6-phosphate; G6P: Glucose 6-phosphate

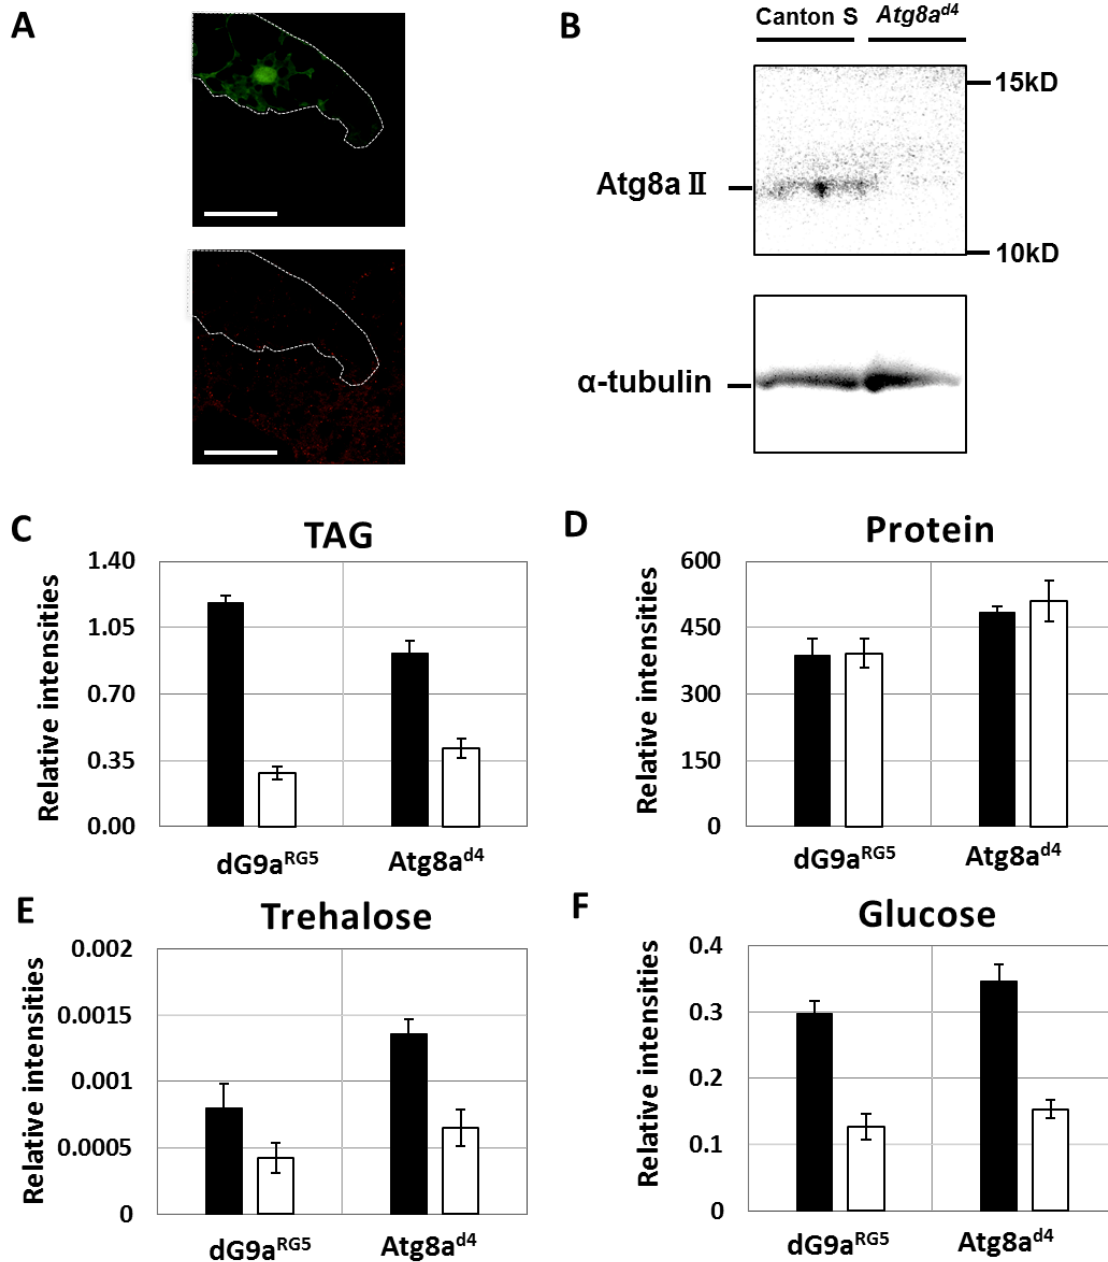

**Figure S4.** (A) Immunostaining of the larval fat body with anti-Atg8a IgG ( $\alpha$ -Atg8a) and anti-GFP IgG ( $\alpha$ -GFP). Atg8a down-regulated clones marked by GFP were generated in larval fat body. Scale bars: 50 $\mu$ m. (B) A western blot analysis of extracts from Canton S and *Atg8a<sup>d4</sup>*. Blots were probed with anti-Atg8a and anti- $\alpha$ -tubulin antibodies. The comparison of TAG, total protein, trehalose and glucose levels between *dG9a<sup>RG5</sup>* and *Atg8a<sup>d4</sup>* were shown in (C), (D), (E) and (F), respectively. No significant differences were observed between *dG9a<sup>RG5</sup>* and *Atg8a<sup>d4</sup>* at 24 h after starvation. Error bars represent SE.

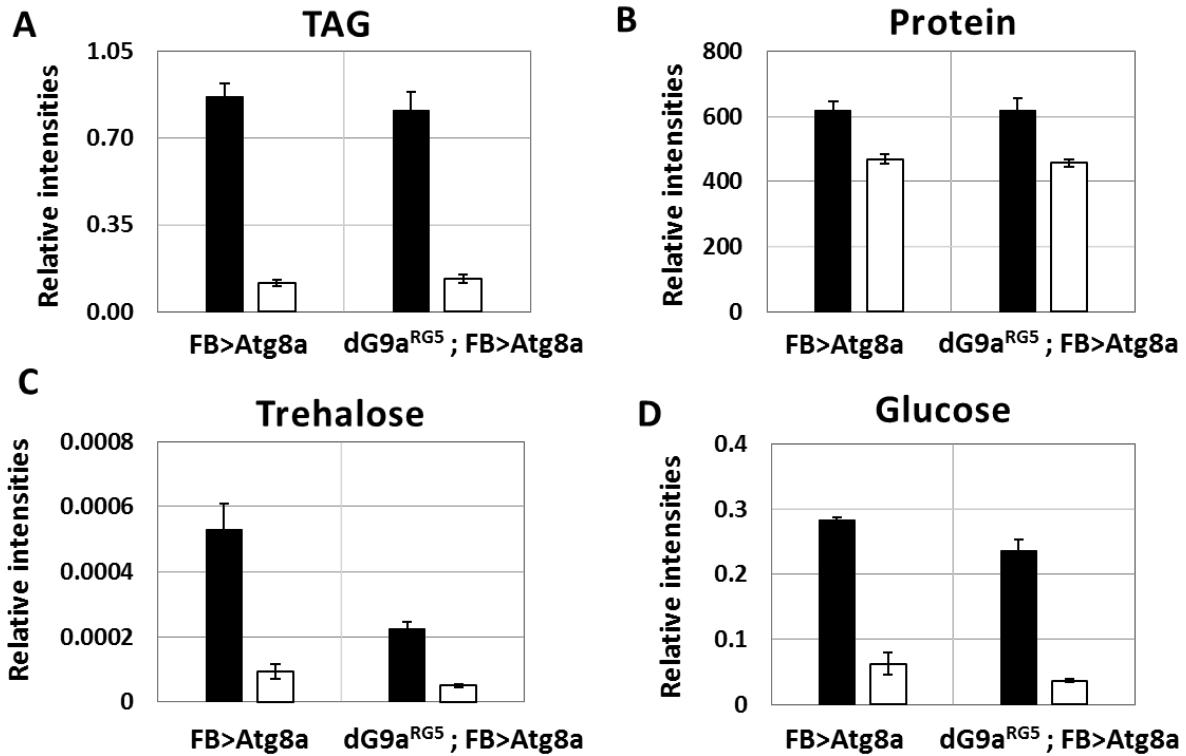

**Figure S5.** The comparison of energy reservoirs between the males of *dG9a<sup>RG5</sup>*, *FB>Atg8a* (*dG9a<sup>RG5</sup>*; *FB-GAL4/ Atg8a<sup>Scer/UAS.P/T.T:Avic/GFP-EGFP,T:Disc/RFP-mCherry</sup>*; +) (n=39 from 2 independent experiments) and *FB>Atg8a* (+; *FB-GAL4/ Atg8a<sup>Scer/UAS.P/T.T:Avic/GFP-EGFP,T:Disc/RFP-mCherry</sup>*; +) (n=38 from 2 independent experiments) strains. The level of TAG, total protein, trehalose and glucose were shown in (A), (B), (C), and (D), respectively. No significant differences were observed at 24 h after starvation. Error bars represent SE.



**A**

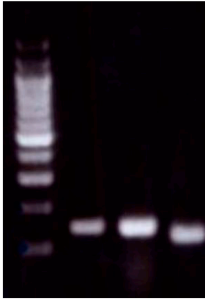

**B**

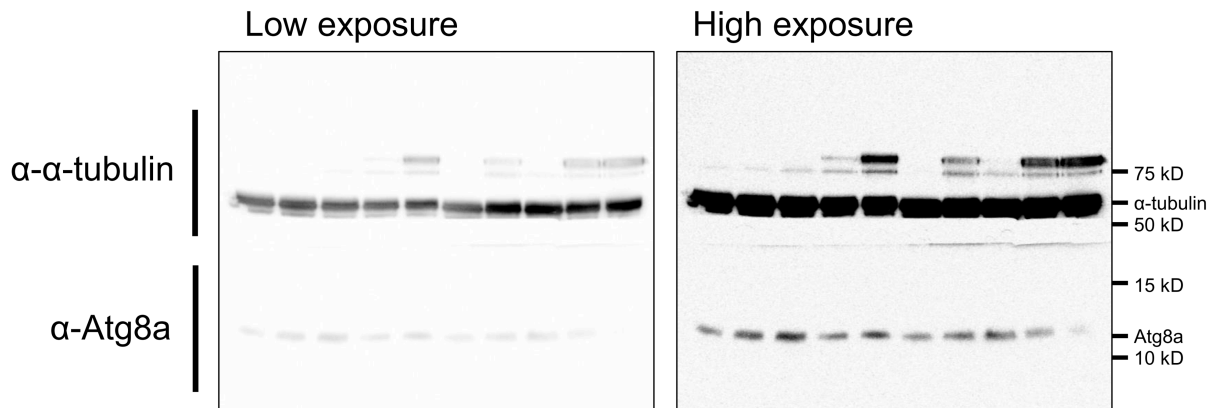

**Figure S6. (A)** The full-length image of Figure 2F. **(B)** The full-length image of Figure 6B.
